# Supplementary material
Source: Springer Nature journal article supplement (https://www.springermedizin.de/resource/supplementary/12985_2007_266_MOESM4_ESM.pdf/9607666)

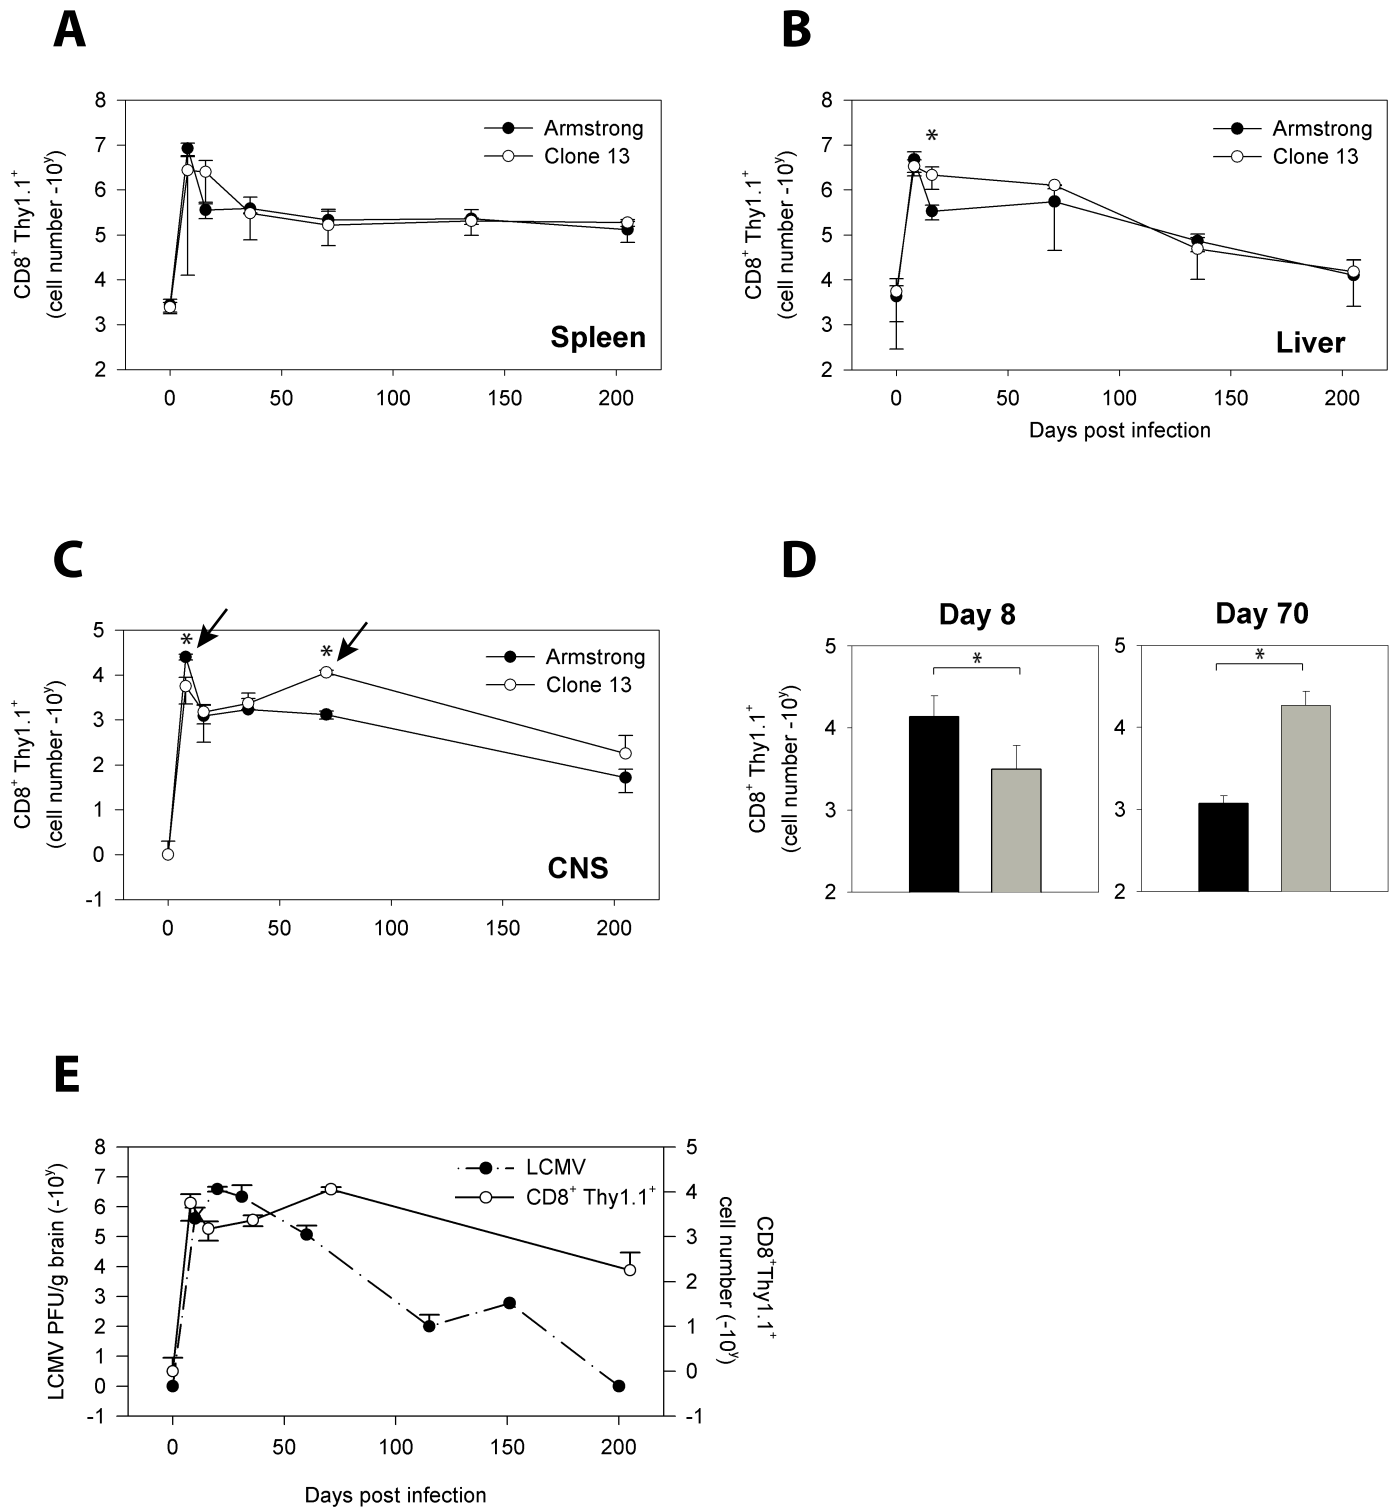

**Figure 4**

Supplement: MOESM4 [file 9607666]
